# Supplementary material
Source: Springer Nature journal article supplement (https://www.springermedizin.de/resource/supplementary/12887_2011_591_MOESM3_ESM.pdf/9475848)

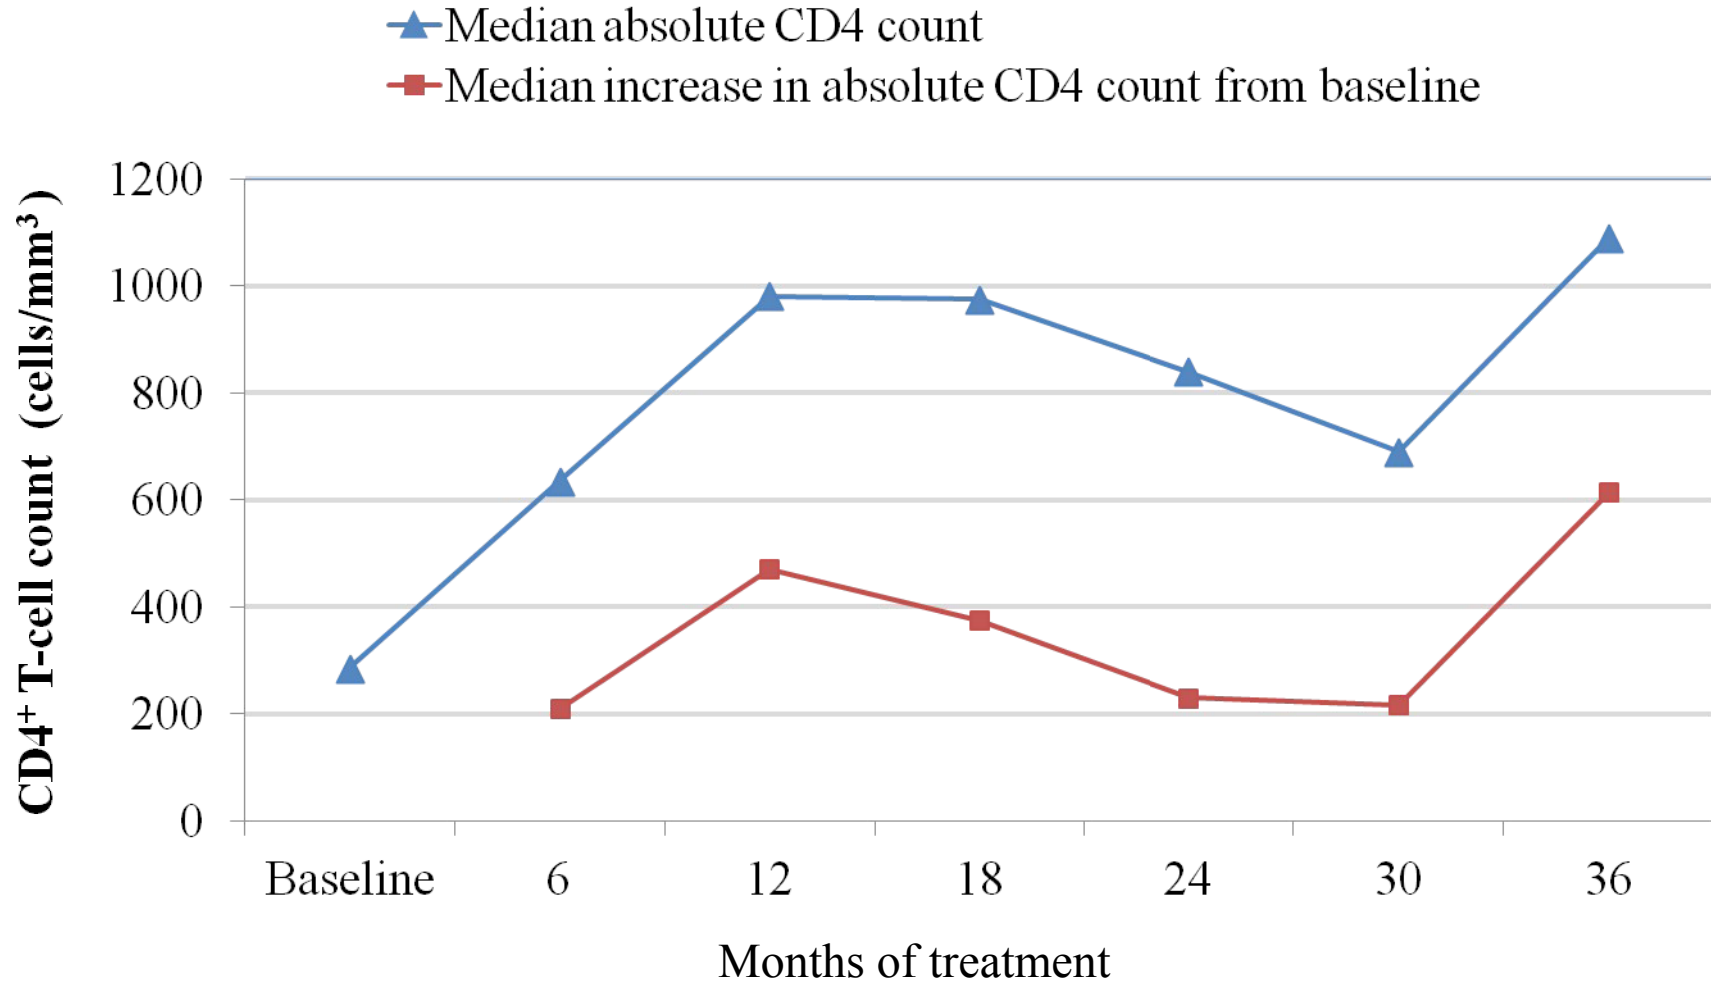

|                                         |           |           |           |           |           |           |           |
|-----------------------------------------|-----------|-----------|-----------|-----------|-----------|-----------|-----------|
| Number of children >5 years followed up | <b>31</b> | <b>25</b> | <b>22</b> | <b>20</b> | <b>17</b> | <b>13</b> | <b>10</b> |
| Number tested                           | <b>31</b> | <b>20</b> | <b>21</b> | <b>20</b> | <b>15</b> | <b>12</b> | <b>7</b>  |

Supplement: MOESM3 [file 9475848]
